# Supplementary material for: An Anthocyanin-Based Eco-Friendly Triboelectric Nanogenerator for pH Monitoring and Energy Harvesting
Source: MDPI journal article supplement (doi:10.3390/molecules29091925), 2024-04-23
Supplement: s1 [file s1]

# **An Anthocyanin-Based Eco-Friendly Triboelectric Nanogenerator for pH Monitoring and Energy Harvesting**

Wuliang Sun <sup>1,2</sup>, Junhui Dong <sup>1,\*</sup>, Wenbo Li <sup>3</sup>, Xiaobo Gao <sup>4,5</sup>, Jun Liu <sup>1</sup> and Ding Nan <sup>2,\*</sup>

<sup>1</sup> School of Materials Science and Engineering, Inner Mongolia University of Technology, Hohhot 010051, China

<sup>2</sup> College of Chemistry and Chemical Engineering, Inner Mongolia University, Hohhot 010021, China

<sup>3</sup> College of Food Science and Engineering, Inner Mongolia Agricultural University, Hohhot 010018, China

<sup>4</sup> Institute of Applied Nanotechnology, Jiaxing 314031, China

<sup>5</sup> Beijing Institute of Nanoenergy and Nanosystems, Chinese Academy of Sciences, Beijing 101400, China

\* Correspondence: [jhdong@imut.edu.cn](mailto:jhdong@imut.edu.cn) (J.D.); [nd@imu.edu.cn](mailto:nd@imu.edu.cn) (D.N.)

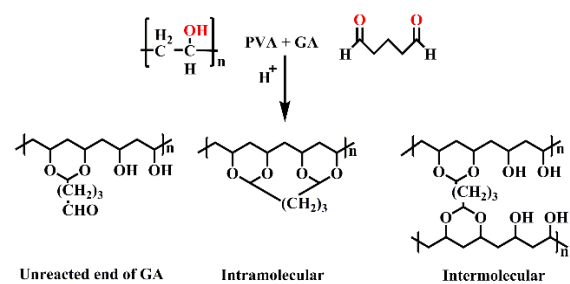

**Figure S1.** Chemical structure during the fiber film crosslinking reaction.

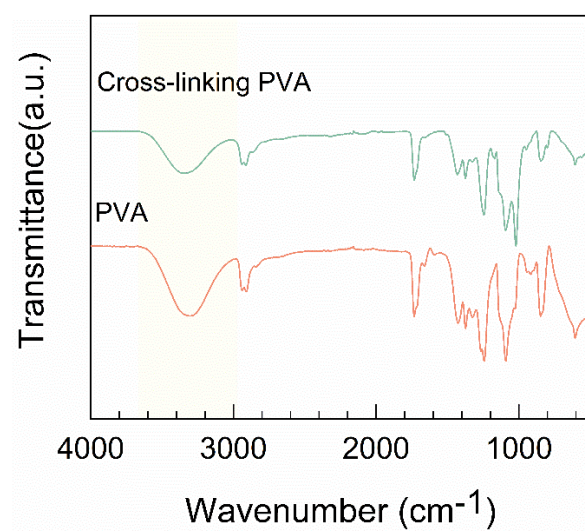

**Figure S2.** FT-IR spectra of different nanofiber membranes.

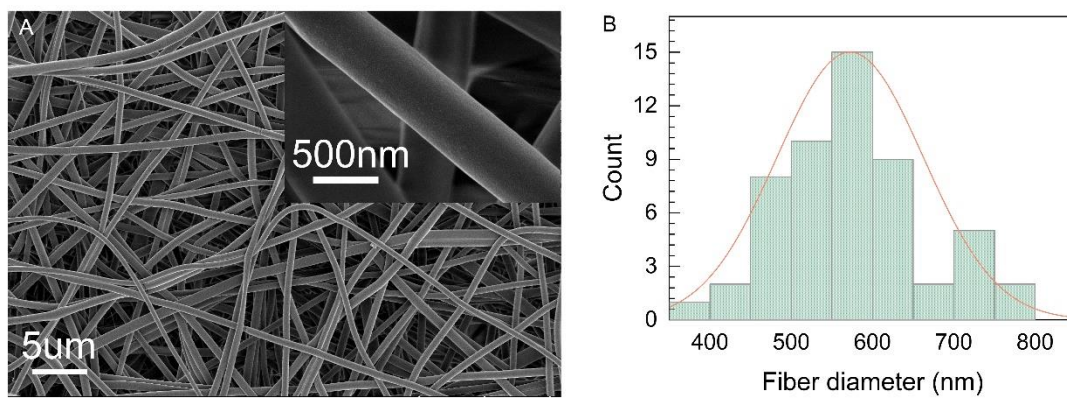

**Figure S3.** A) SEM image of pure PVA fiber film. B) Fiber diameter distribution of pure PVA fiber film.

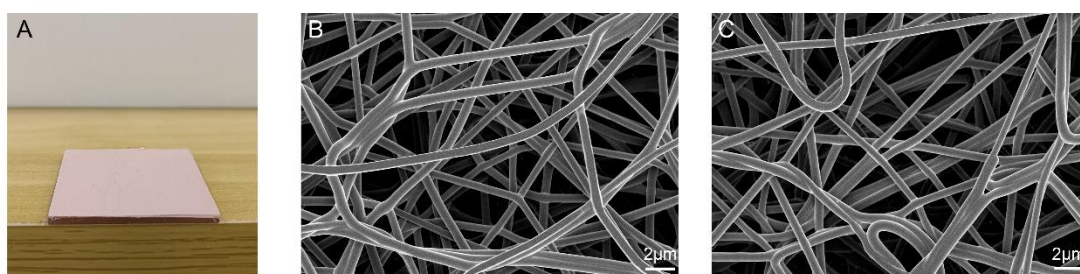

**Figure S4.**A) Photographs of PVA@Ac fiber surfaces following the durability experiments. B) SEM images of PVA@Ac fibers before the durability experiments. C) SEM images of PVA@Ac fibers after durability testing.

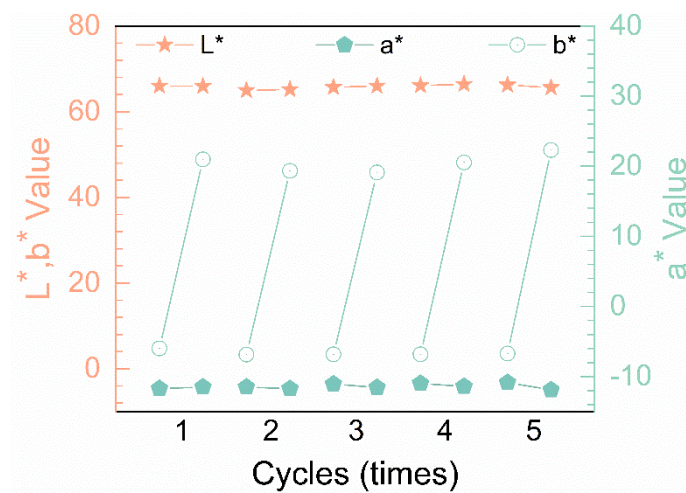

**Figure S5.** The Reusability of pH-TENG.

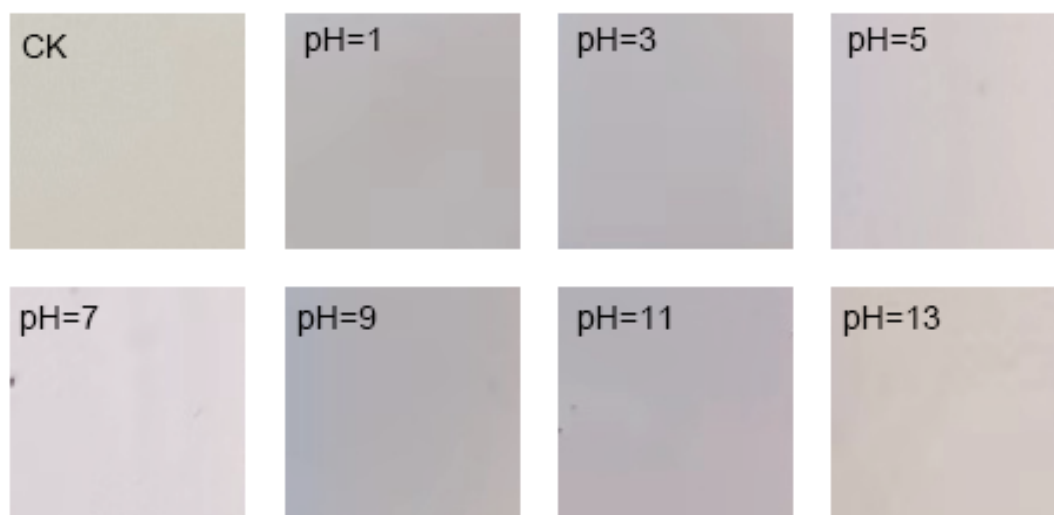

**Figure S6.** The color variations of pure PVA under different pH values.

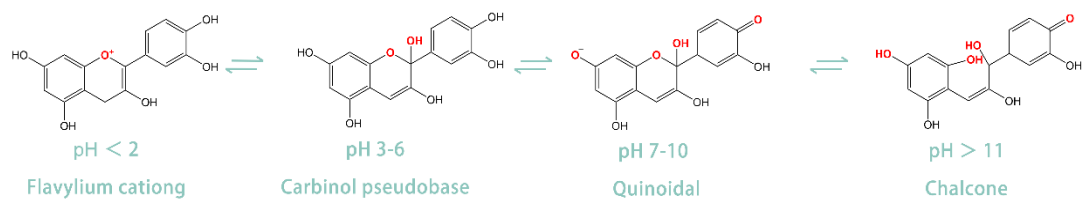

**Figure S7.** Structural transformations of anthocyanin in response to pH variations.
